# Supplementary material
Source: publisher figshare collection journal article supplement (https://acs.figshare.com/ndownloader/files/4073086)
Supplement: Supplementary file 1 [file 4073086]

# Supporting information

## **Preparation of NiCe mixed oxides for catalytic decomposition of N<sub>2</sub>O**

Haibo Zhou, Peilei Hu, Zhen Huang, Feng Qin, Wei Shen, and Hualong Xu \*

Department of Chemistry, Shanghai Key Laboratory of Molecular Catalysis and Innovative Materials, Laboratory of Advanced Materials, Fudan University, Shanghai 200433, China

Phone: +86-21-65642401; Fax: +86-21-65641740;

E-mail: shuhl@fudan.edu.cn

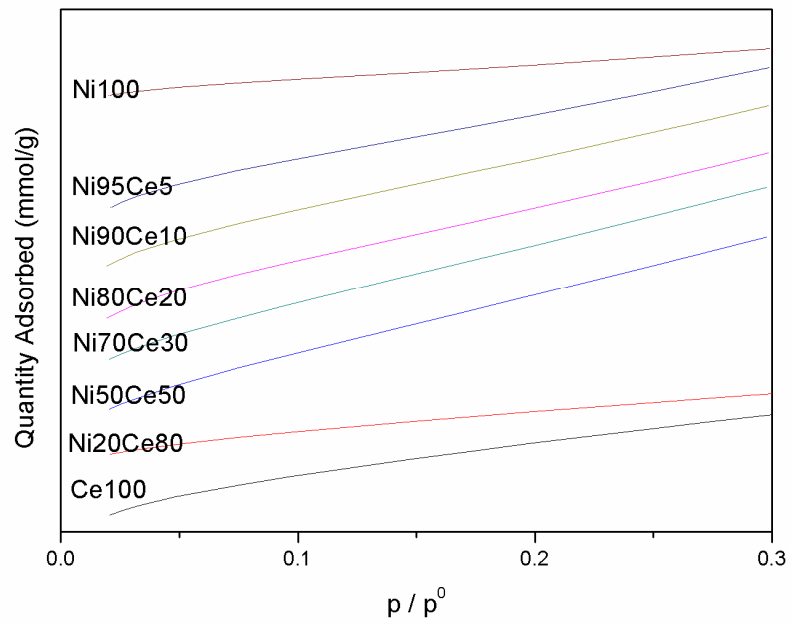

Figure S1. N<sub>2</sub> adsorption isotherms of NiCe mixed oxides catalysts with different Ni/Ce ratios.

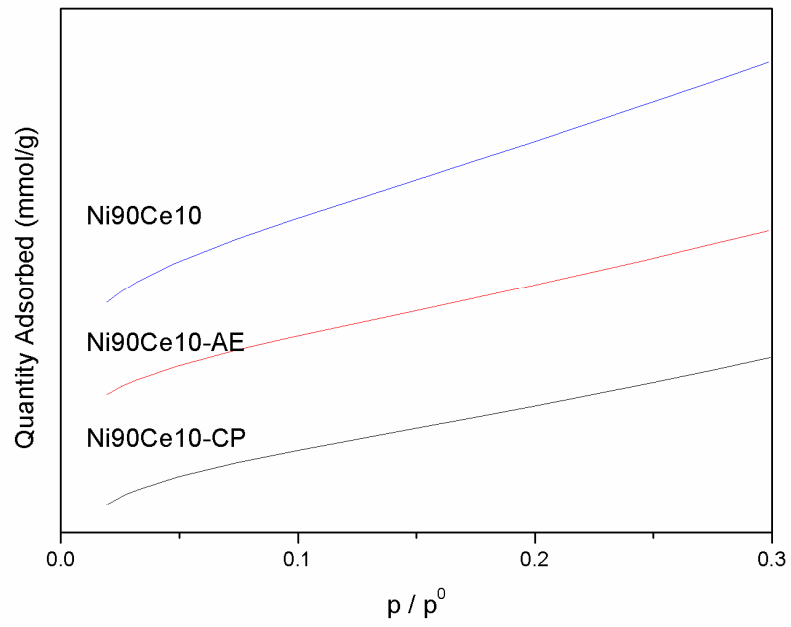

Figure S2. N<sub>2</sub> adsorption isotherms of NiCe mixed oxides catalysts prepared by different methods.
